# Supplementary material for: A new intermediate in the Prins reaction
Source: publisher site journal article supplement (doi:10.3762/bjoc.9.51), 2013-03-05
Supplement: Additional file 1 [file 1860-5397-9-51-S1.pdf]

# Supporting Information for

## A new intermediate in the Prins reaction

Shinichi Yamabe,<sup>1\*</sup> Takeshi Fukuda<sup>2</sup> and Shoko Yamazaki<sup>2</sup>

Address: <sup>1</sup>Fukui Institute for Fundamental Chemistry, Kyoto University

Takano-Nishihiraki-cho 34-4, Sakyou-ku, Kyoto 606-8103, Japan and <sup>2</sup>Department of

Chemistry, Nara University of Education, Takabatake-cho, Nara 630-8528, Japan

Email: Shinichi Yamabe - [yamabes@fukui.kyoto-u.ac.jp](mailto:yamabes@fukui.kyoto-u.ac.jp)

\*Corresponding author

### Geometries of the precursor, intermediates and products, and other related geometries.

**Figure S1:** Geometries of intermediates and products of the propene Prins reaction.

Page S2

**Figure S2:** Geometries at the 200 femtoseconds passed from TS1(Me), TS2(Me), TS3(Me), TS4(Me) in Figure 1 and TS1(Ph) in Figure 3.

Pages S3–S7

**Figure S3:** Geometries of the precursor, intermediates and products of the styrene Prins reaction.

Pages S8–S9

**Figure S4:** A carbocation [X(Ph)] formation path calculated by B3LYP/6-311+G(d,p).

Page S10

**Figure S5:** The initial geometry composed of that of the carbocation X(Ph) and (H<sub>2</sub>O)<sub>7</sub> is converted into that of diol(Ph) and (H<sub>2</sub>O)<sub>7</sub> both by B3LYP/6-31G(d) and by B3LYP/6-311+G(d,p). The molecular formula of the system is C<sub>10</sub>H<sub>55</sub>O<sub>23</sub><sup>+</sup>. Pages S11–S12

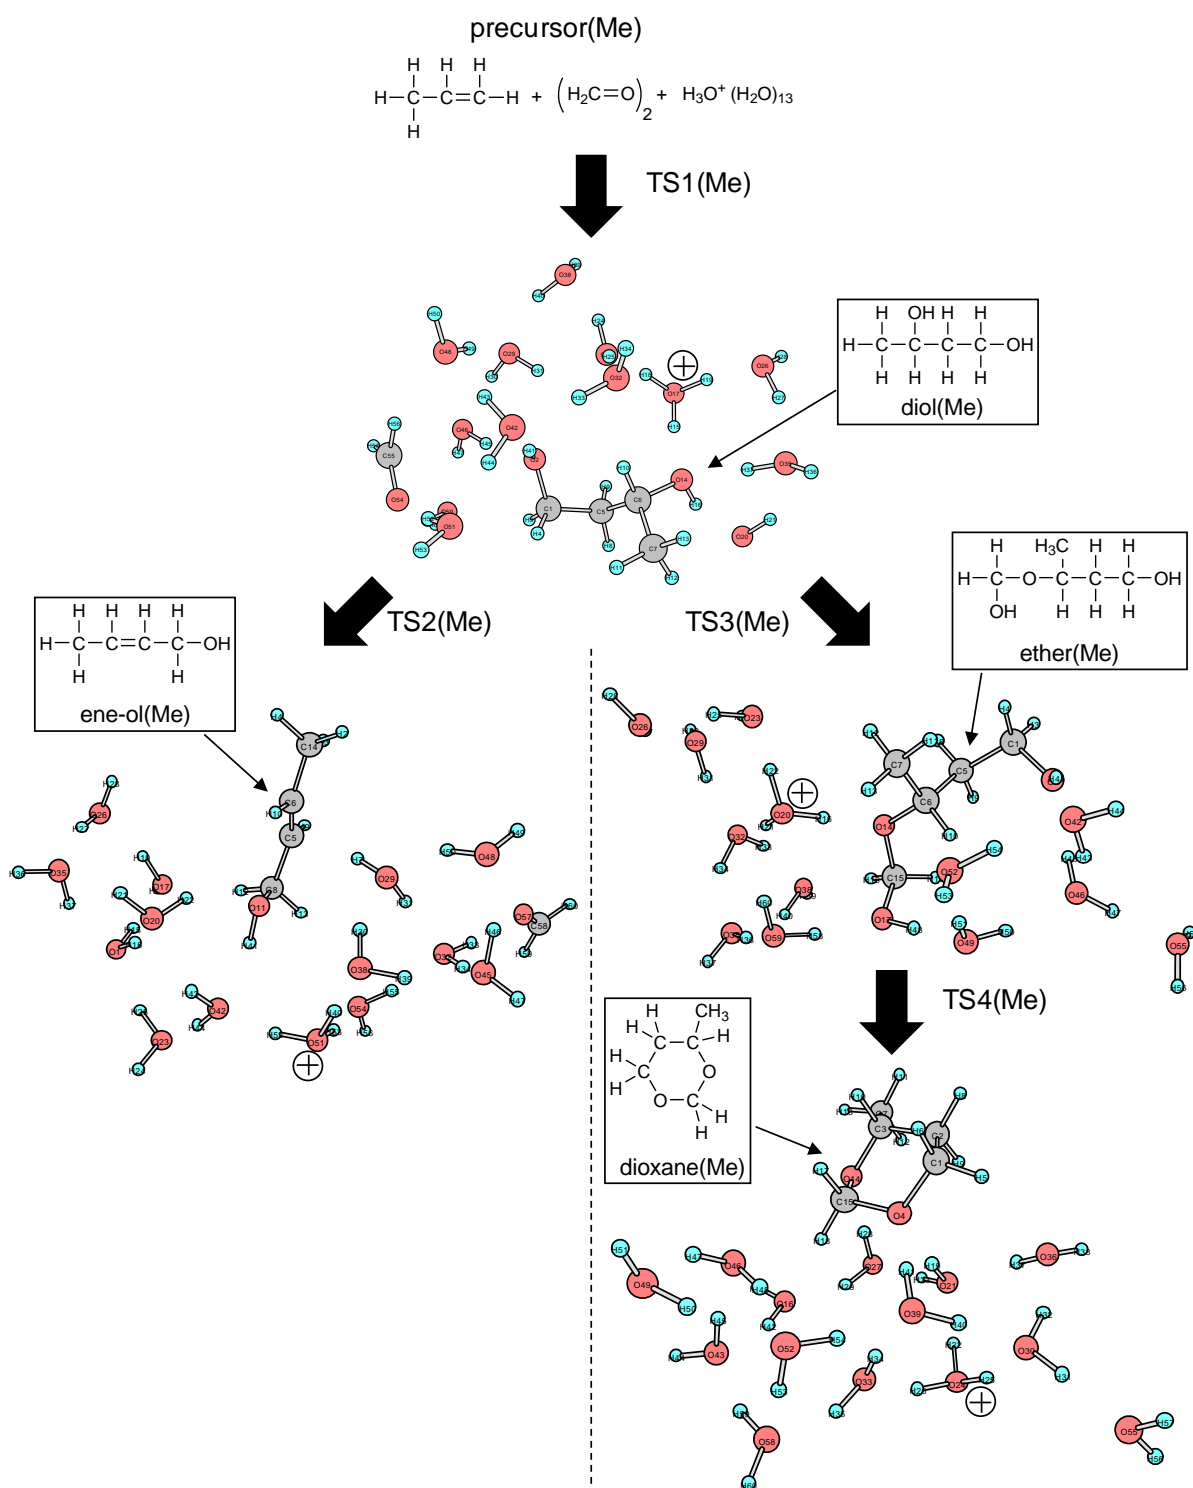

**Figure S1:** Geometries of intermediates and products of the propene Prins reaction. TS geometries are shown in Figure 1.

TS1(Me)

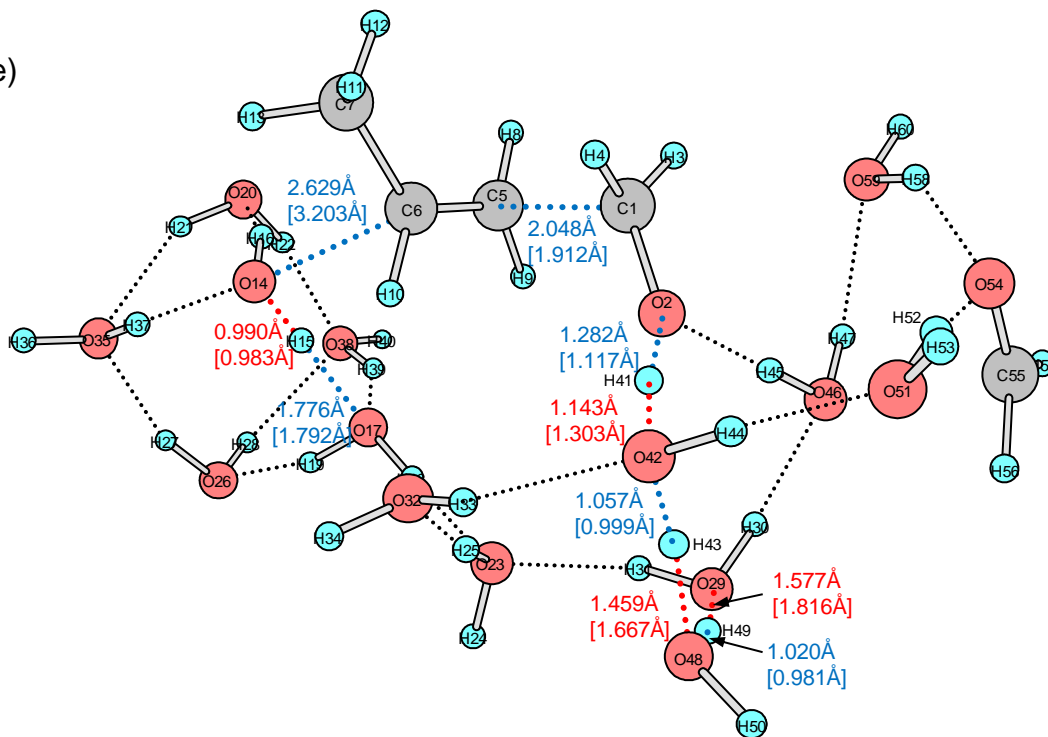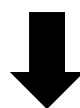

200 femtoseconds

ADMP-1(Me)

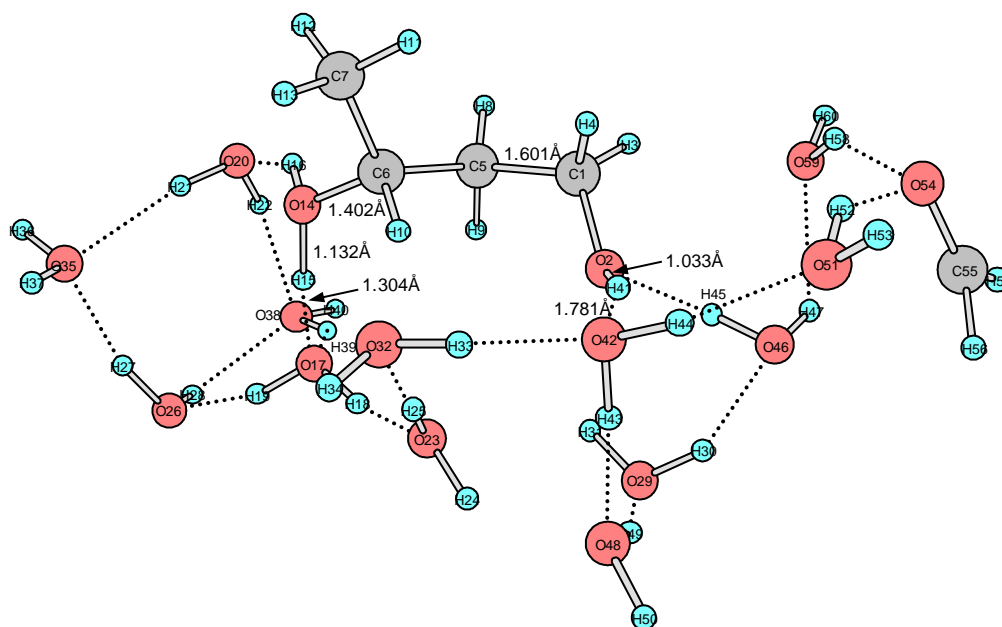

TS2(Me)

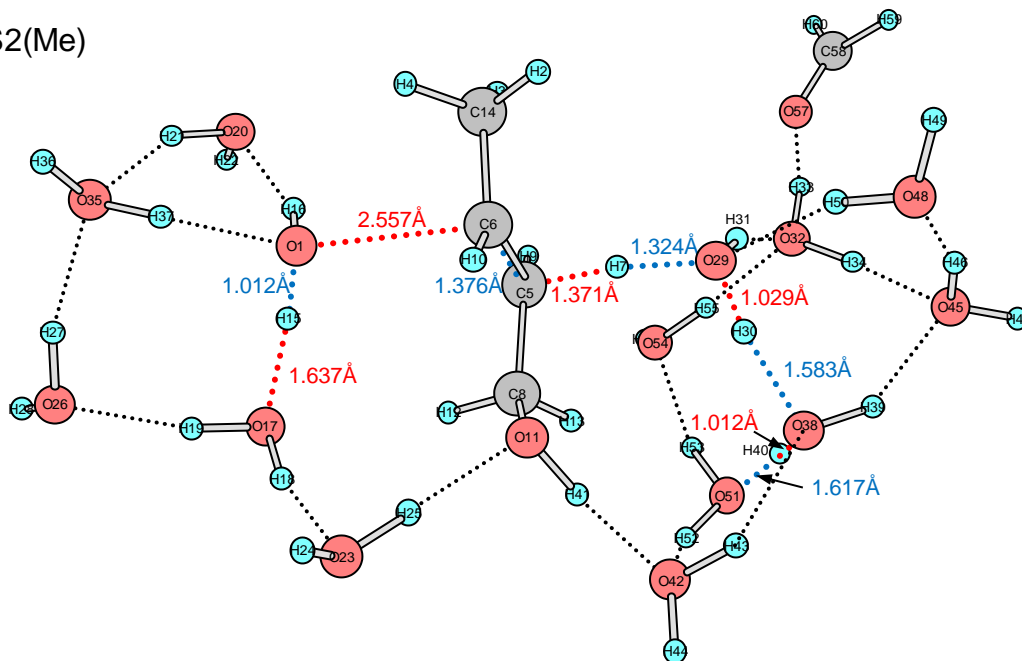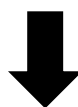

200 femtoseconds

ADMP-2(Me)

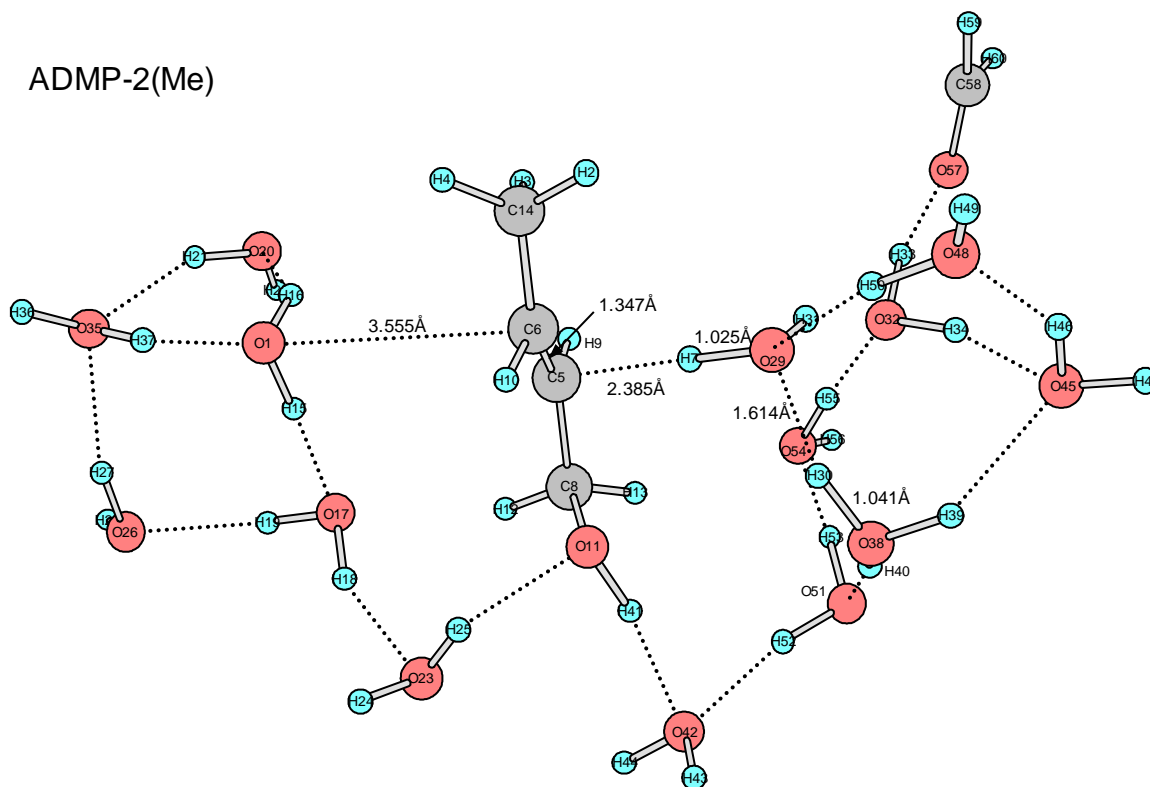

TS3(Me)

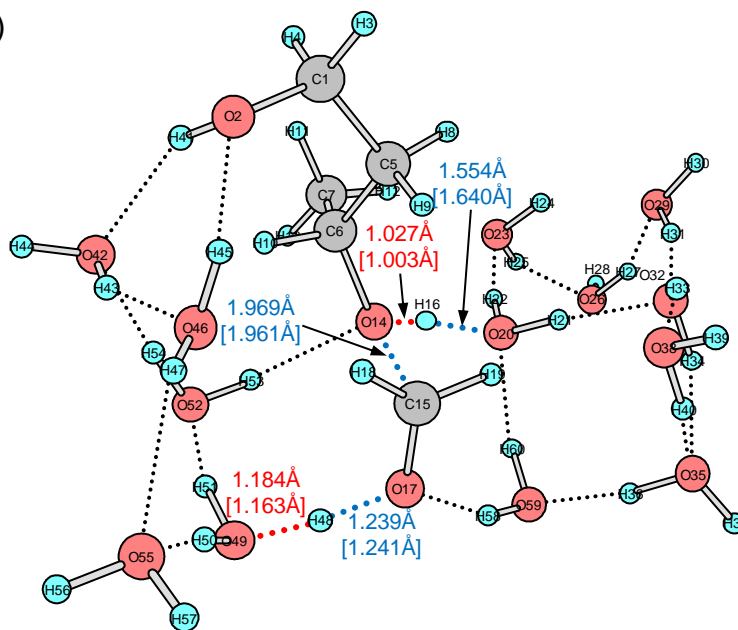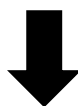

200 femtoseconds

ADMP-3(Me)

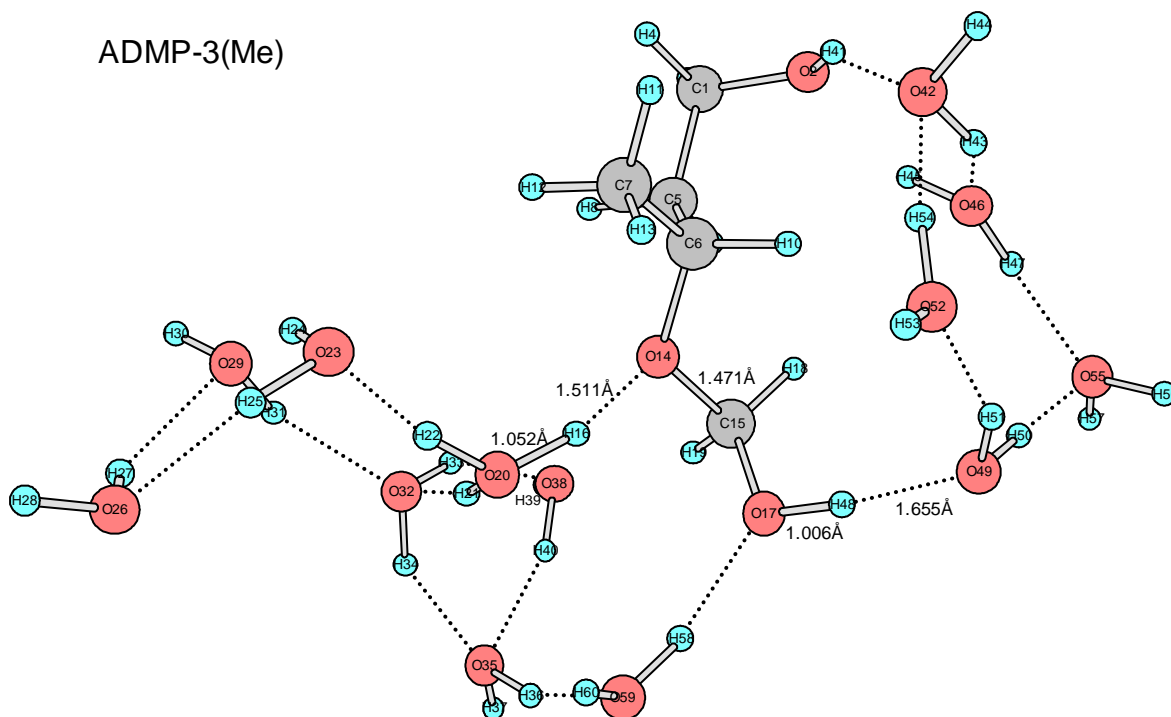

TS4(Me)

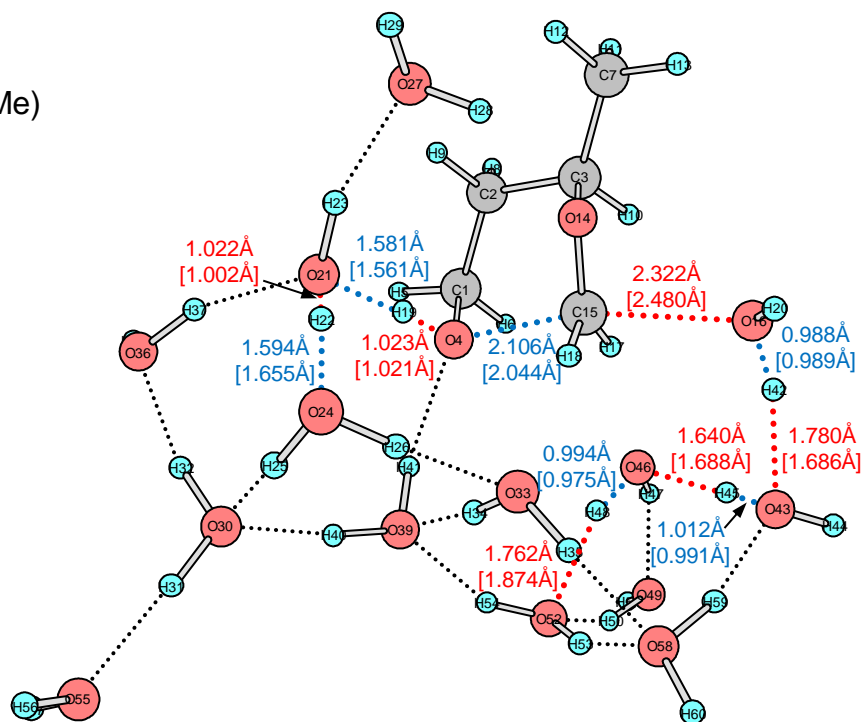

200 femtoseconds

ADMP-4(Me)

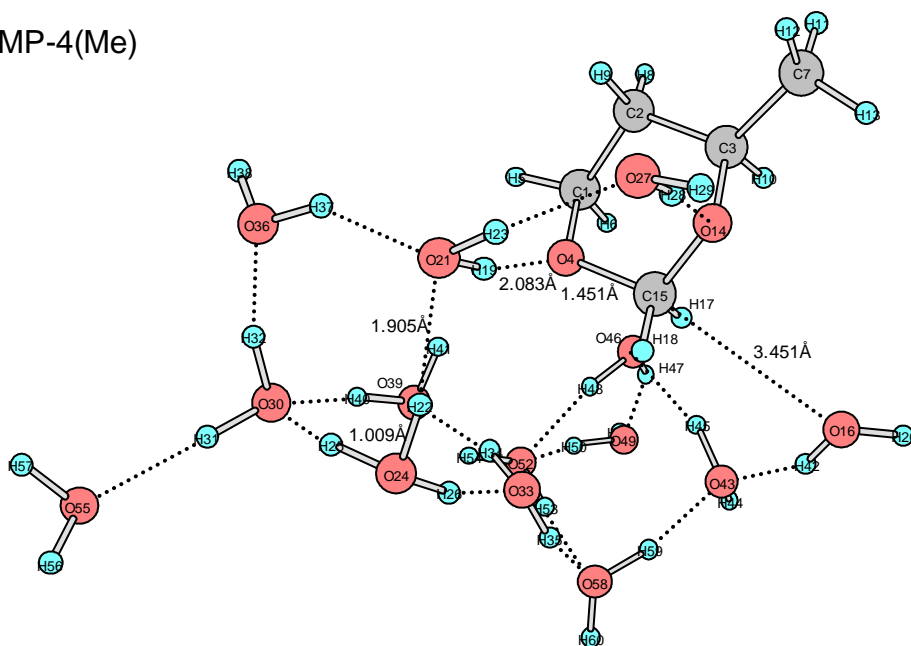

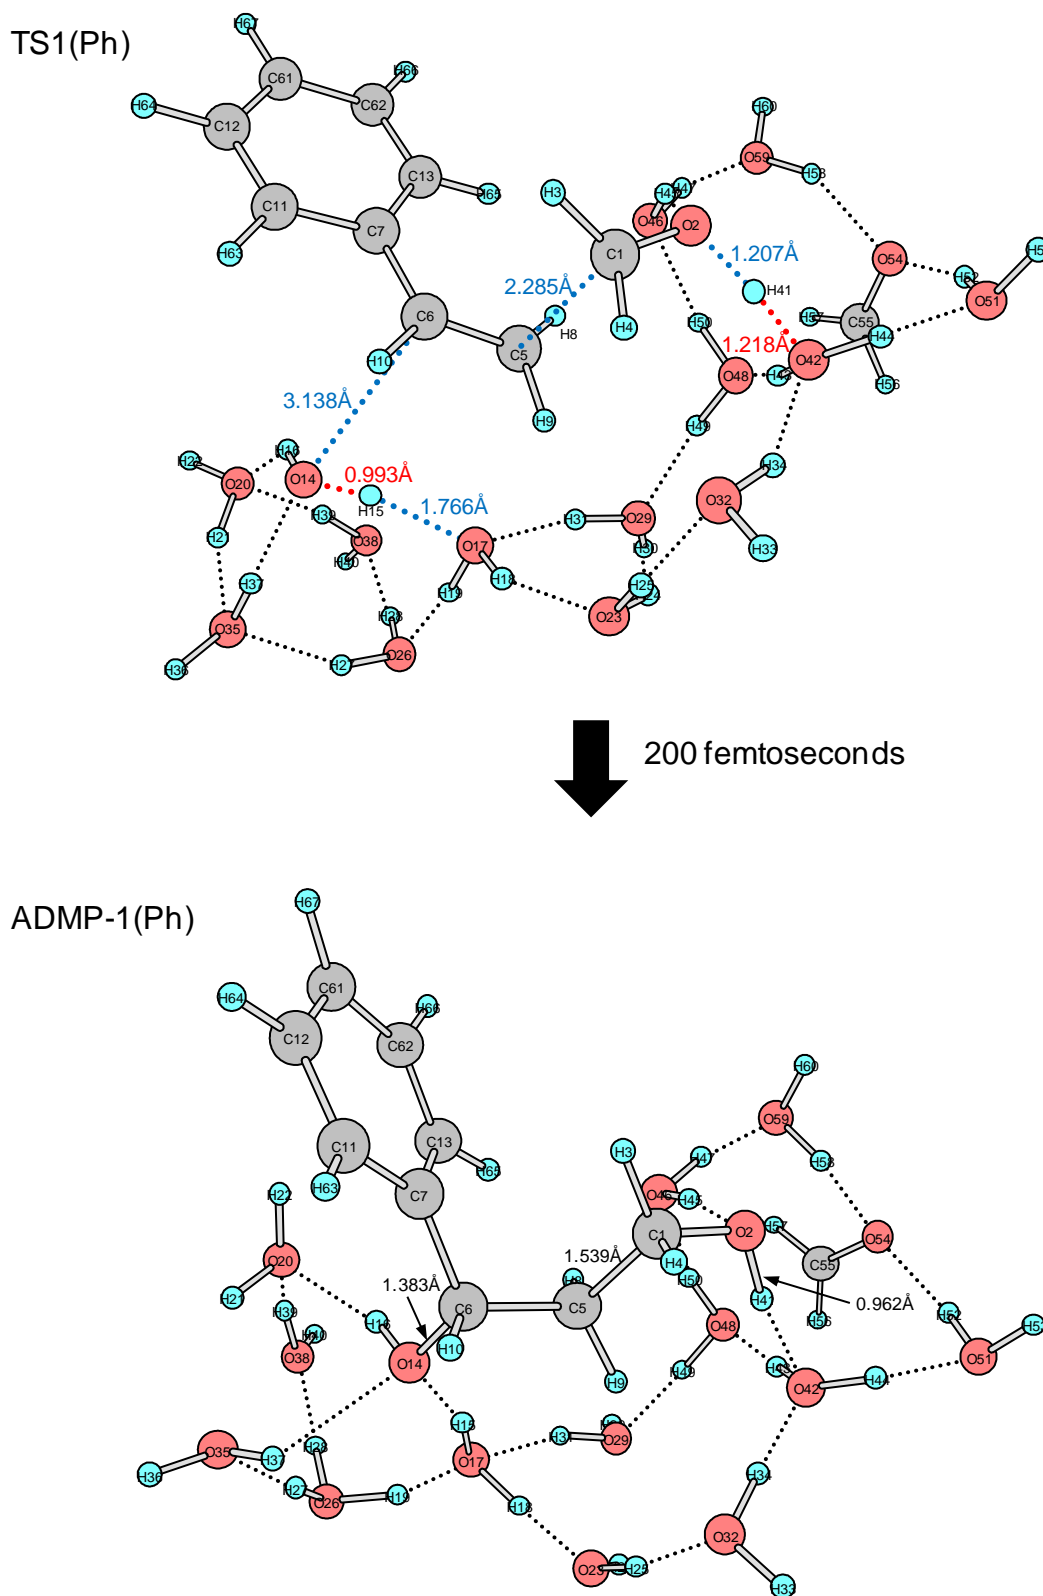

**Figure S2:** Geometries at the 200 femtoseconds passed from TS1(Me), TS2(Me), TS3(Me), TS4(Me) in Figure 1 and TS1(Ph) in Figure 3.

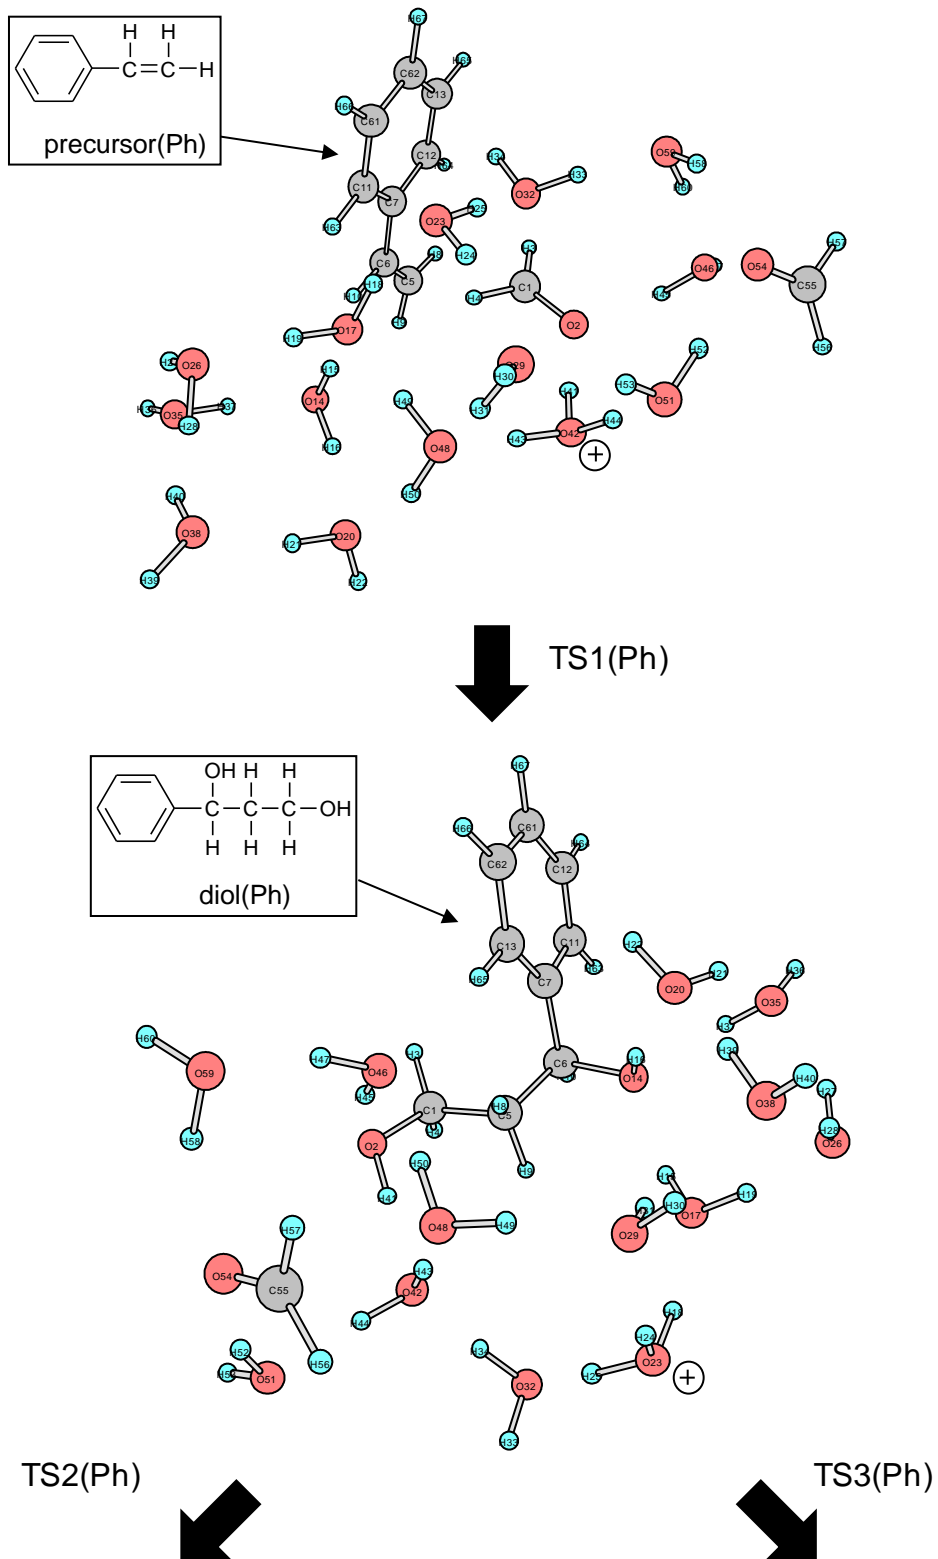



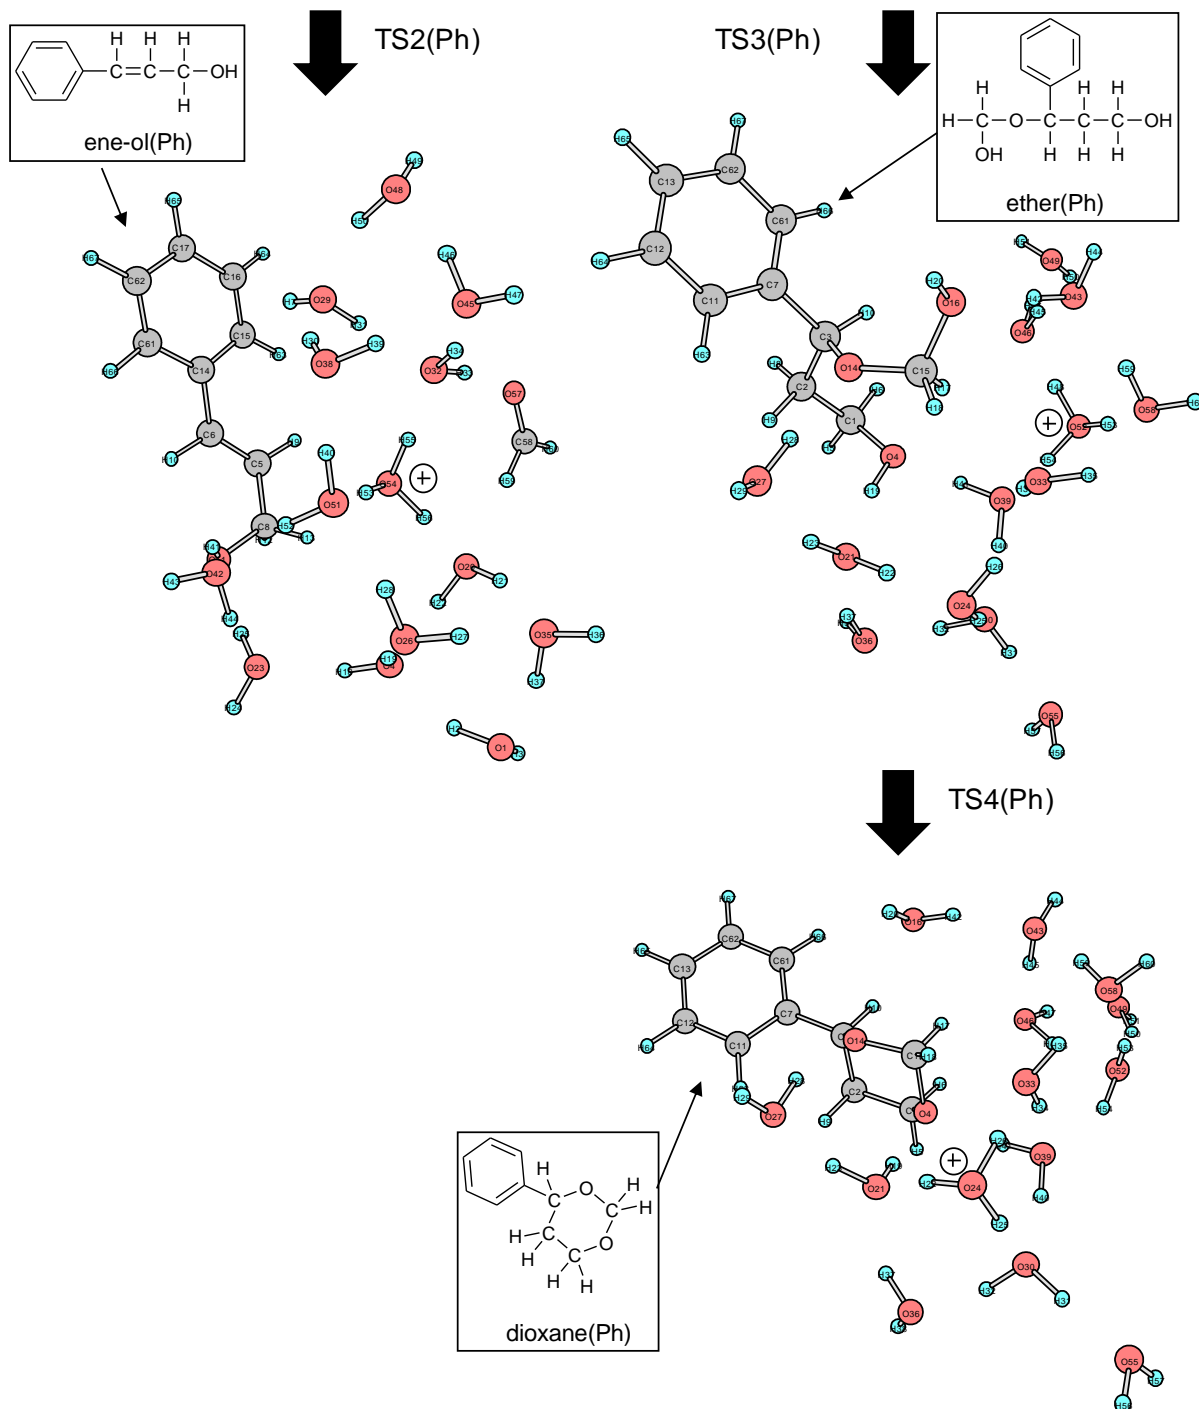

**Figure S3:** Geometries of the precursor, intermediates and products of the styrene Prins reaction. TS geometries are shown in Figure 3.

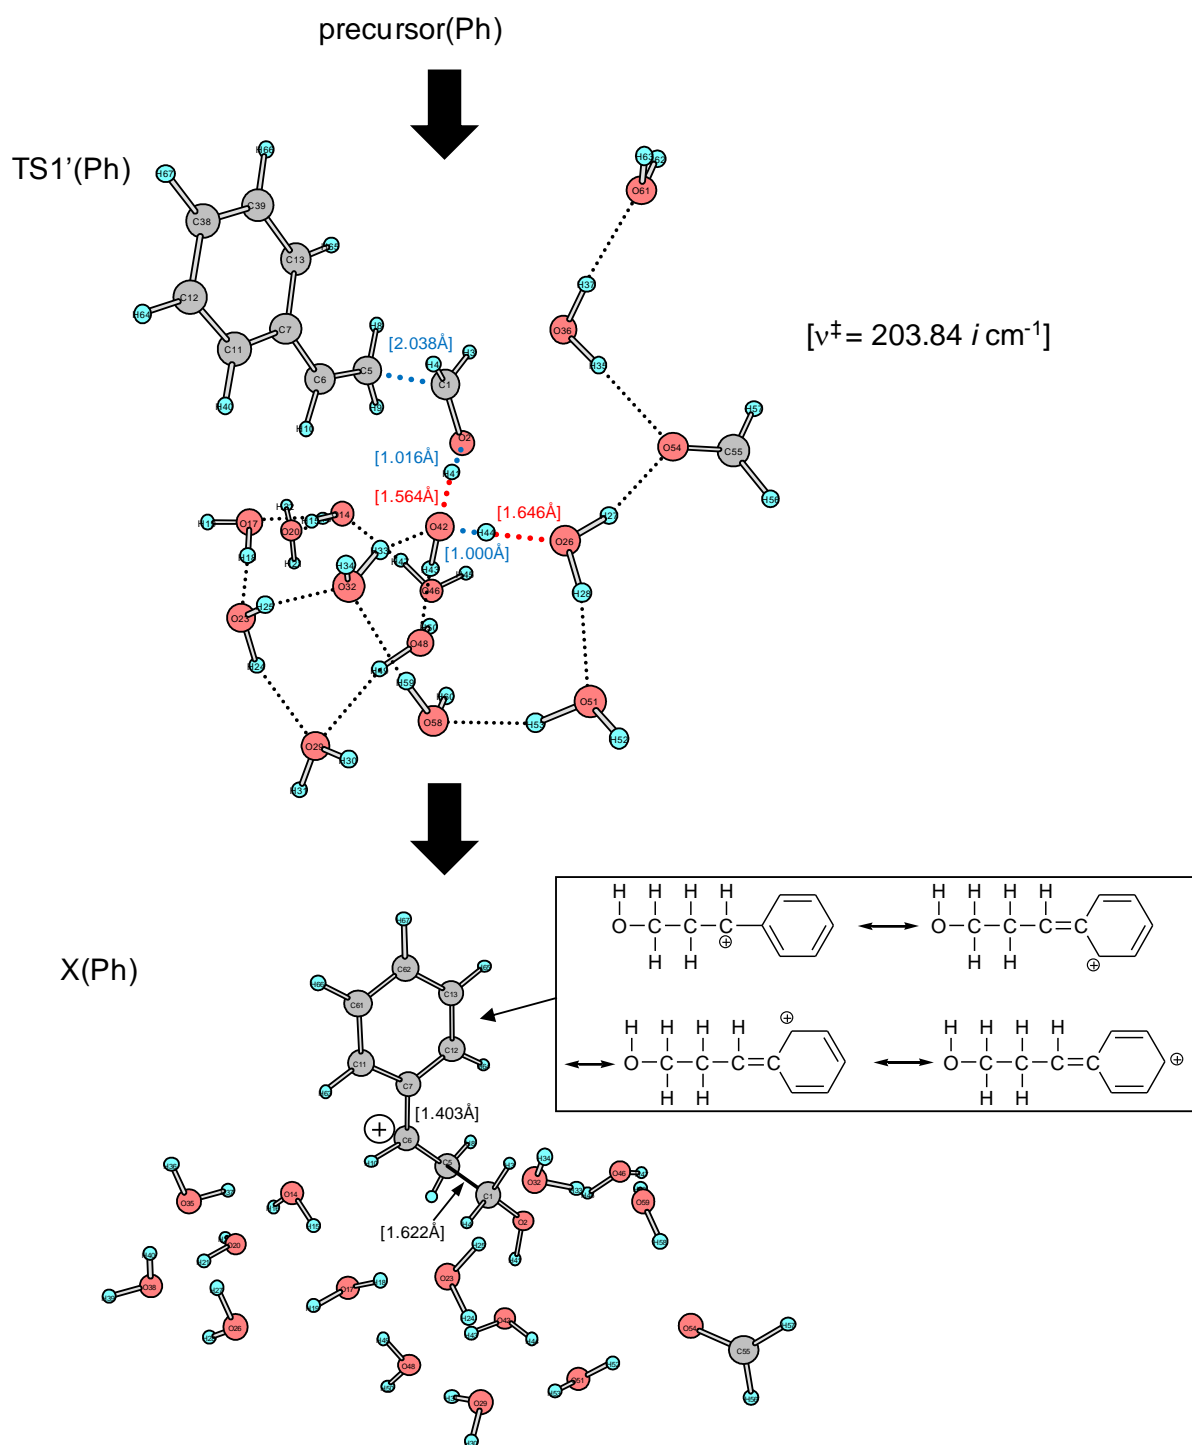

**Figure S4:** A carbocation [X(Ph)] formation path calculated by B3LYP/6-311+G(d,p). The geometry of precursor(Ph) is shown in Figure S3. The cation X(Ph) is stabilized by canonical resonance structures exhibited in the box.

### The initial geometry

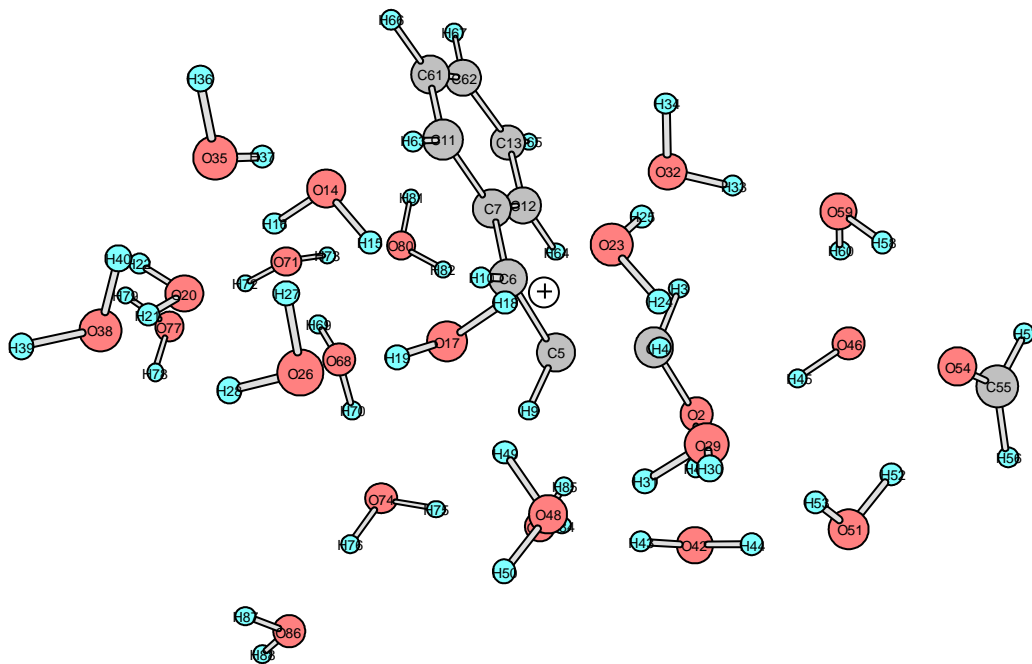

↓ B3LYP/6-31G(d)

### The optimized geometry

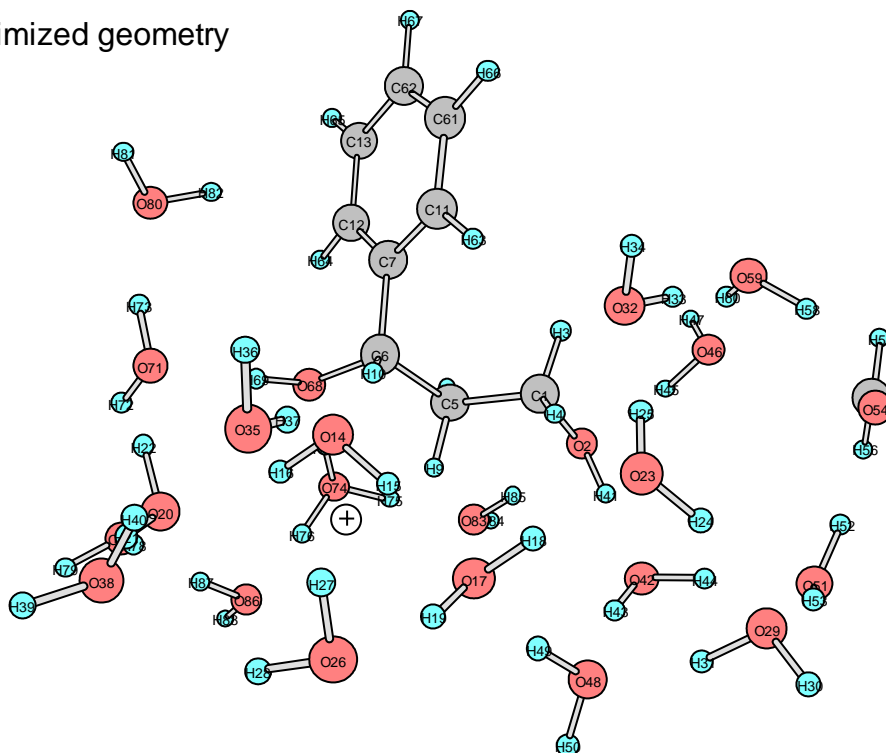

The initial geometry

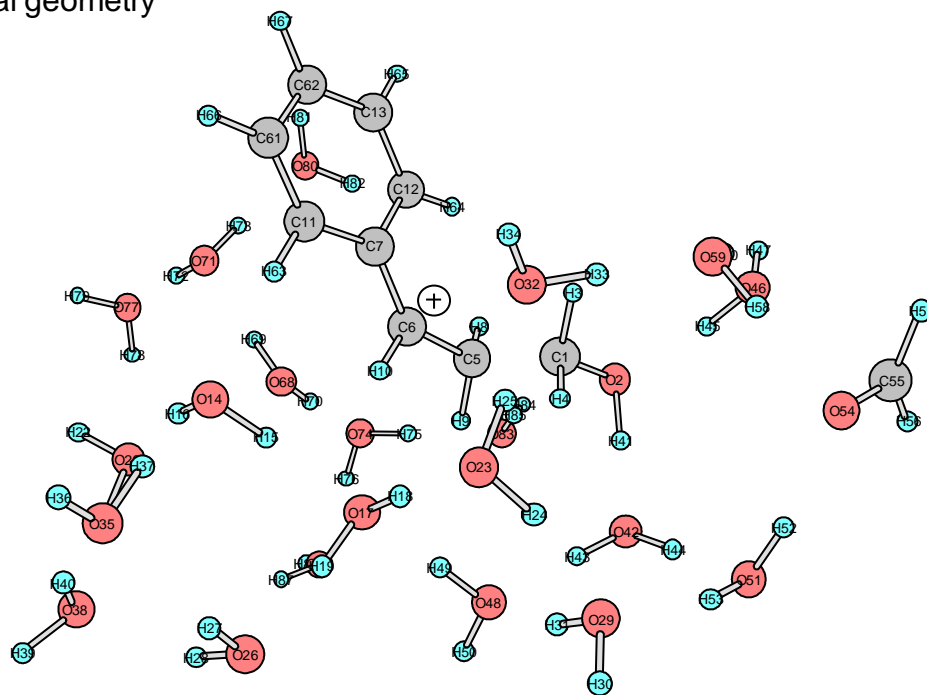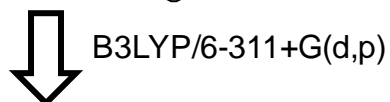

The optimized geometry

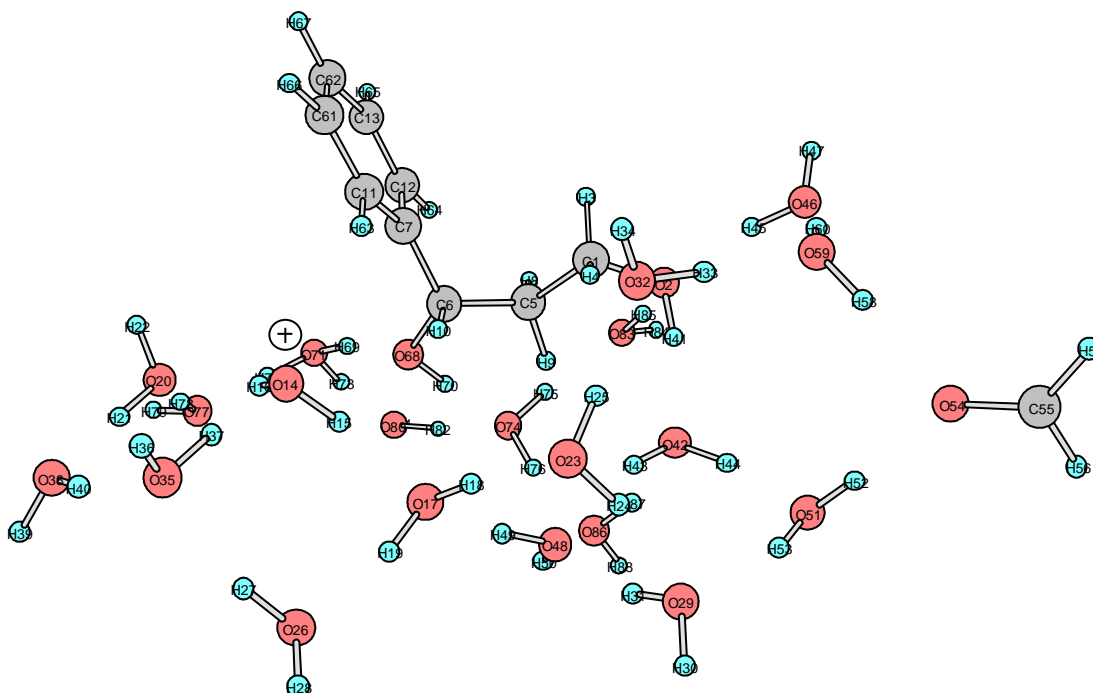

**Figure S5:** The initial geometry composed of that of the carbocation X(Ph) and  $(\text{H}_2\text{O})_7$  is converted into that of diol(Ph) and  $(\text{H}_2\text{O})_7$  both by B3LYP/6-31G(d) and by B3LYP/6-311+G(d,p). The molecular formula of the system is  $\text{C}_{10}\text{H}_{55}\text{O}_{23}^+$ .
